# Supplementary material for: Influencing factors of Sleep Disorders in Amyotrophic Lateral Sclerosis: A Cross-sectional Study
Source: Research Square preprint supplement (doi:10.21203/rs.3.rs-7024421/v1), 2025-07-21
Supplement: Supplementary file 1 [file 25738dd551be55b7207fcf6a.docx]

**Supplement table 2  Factors related to sleep quality in univariate linear regression analysis.**

| Variables | β | S.E | t | *P* | β (95%CI) |
| --- | --- | --- | --- | --- | --- |
|
| FSS | 0.11 | 0.02 | 6.32 | **<.001** | 0.11 (0.07 ~ 0.14) |
| VAS | 0.61 | 0.16 | 3.69 | **<.001** | 0.61 (0.28 ~ 0.93) |
| HARS | 0.27 | 0.03 | 9.42 | **<.001** | 0.27 (0.21 ~ 0.33) |
| HDRS | 0.19 | 0.03 | 5.63 | **<.001** | 0.19 (0.12 ~ 0.26) |
| ESS | 0.20 | 0.15 | 1.32 | 0.190 | 0.20 (-0.10 ~ 0.49) |
| ALSFRS-RB | -0.20 | 0.11 | -1.83 | 0.069 | -0.20 (-0.41 ~ 0.01) |
| ALSFRS-RL | -0.14 | 0.04 | -3.21 | **0.001** | -0.14 (-0.22 ~ -0.05) |
| ALSFRS-RR | -0.43 | 0.12 | -3.62 | **<.001** | -0.43 (-0.67 ~ -0.20) |
| Progression Rate | 0.52 | 0.14 | 3.79 | **<.001** | 0.52 (0.25 ~ 0.80) |
| Age | 0.07 | 0.03 | 2.97 | **0.003** | 0.07 (0.03 ~ 0.12) |
| Disease duration | 0.00 | 0.03 | 0.08 | 0.937 | 0.00 (-0.06 ~ 0.06) |
| Fvc | -0.04 | 0.01 | -2.88 | **0.004** | -0.04 (-0.06 ~ -0.01) |
| CI: Confidence Interval | | | | | |

Note:FSS, Fatigue Severity Scale;VAS,Visual Analog Scale;Amyotrophic Lateral Sclerosis Functional Rating Scale-revised Respiratory Function; HARS, Hamilton Anxiety Rating Scale; HADS, Hamilton Depression Rating Scale; ESS,Epworth Sleepiness Scale;ALSFRS-RB,Amyotrophic Lateral Sclerosis Functional Rating Scale-revised Bulbar Function;ALSFRS-RL,Amyotrophic Lateral Sclerosis Functional Rating Scale-revised limbs; ALSFRS-RR,Amyotrophic Lateral Sclerosis Functional Rating Scale-revised Respiratory Function;FVC,Forced Lung Function;Clinical variables in bold with statistical significance in univariate regression analysis or considered clinically relevant were included in the multivariate analysis.
