# Supplementary material for: Influencing factors of Sleep Disorders in Amyotrophic Lateral Sclerosis: A Cross-sectional Study
Source: Research Square preprint supplement (doi:10.21203/rs.3.rs-7024421/v1), 2025-07-21
Supplement: Supplementary file 2 [file 7eae65bdfd211269408ce690.docx]

**Supplement table 3 VIF values for each variable in binary logistic regression regression analysis and linear regression analysis**

| Variables | VIF |
| --- | --- |
| FSS | 1.363 |
| VAS | 1.121 |
| HARS | 2.403 |
| HDRS | 2.122 |
| ALSFRS-RL | 1.436 |
| ALSFRS-RR | 1.292 |
| Age | 1.09 |
| Progression Rate | 1.094 |

Note:FSS, Fatigue Severity Scale;VAS,Visual Analog Scale;Amyotrophic Lateral Sclerosis Functional Rating Scale-revised Respiratory Function; HARS, Hamilton Anxiety Rating Scale; HADS, Hamilton Depression Rating Scale; ALSFRS-RL, Amyotrophic Lateral Sclerosis Functional Rating Scale-revised limbs; ALSFRS-RR,Amyotrophic Lateral Sclerosis Functional Rating Scale-revised Respiratory Function; OR, odds ratio. Clinical variables in bold with statistical significance in univariate regression analysis or considered clinically relevant were included in the multivariate analysis.

| Variables | VIF |
| --- | --- |
| FSS | 1.454 |
| VAS | 1.143 |
| HARS | 2.435 |
| HADS | 2.170 |
| ESS | 1.077 |
| ALSFRS-RB | 1.464 |
| ALSFRS-RL | 1.802 |
| ALSFRS-RR | 1.66 |
| Age | 1.12 |
| Progression Rate | 1.138 |
| Disease duration | 1.041 |
| FVC | 1.696 |

Note:FSS, Fatigue Severity Scale;VAS,Visual Analog Scale;Amyotrophic Lateral Sclerosis Functional Rating Scale-revised Respiratory Function; HARS, Hamilton Anxiety Rating Scale; HADS, Hamilton Depression Rating Scale; ESS,Epworth Sleepiness Scale;ALSFRS-RB,Amyotrophic Lateral Sclerosis Functional Rating Scale-revised Bulbar Function;ALSFRS-RL,Amyotrophic Lateral Sclerosis Functional Rating Scale-revised limbs; ALSFRS-RR,Amyotrophic Lateral Sclerosis Functional Rating Scale-revised Respiratory Function;FVC,Forced Lung Function;Clinical variables in bold with statistical significance in univariate regression analysis or considered clinically relevant were included in the multivariate analysis.
