# Supplementary material for: Influencing factors of Sleep Disorders in Amyotrophic Lateral Sclerosis: A Cross-sectional Study
Source: Research Square preprint supplement (doi:10.21203/rs.3.rs-7024421/v1), 2025-07-21
Supplement: Supplementary file 3 [file eeae8fc09ef39c1e38fc7643.docx]

**Supplement table 1 Univariate binary logistic regression analysis of factors associated with sleep disorders.**

| Variables | β | S.E | Z | *P* | OR (95%CI) |
| --- | --- | --- | --- | --- | --- |
|
| FSS | 0.05 | 0.01 | 4.45 | **<.001** | 1.05 (1.03 ~ 1.07) |
| VAS | 0.20 | 0.09 | 2.22 | **0.026** | 1.22 (1.02 ~ 1.45) |
| HARS | 0.15 | 0.02 | 6.11 | **<.001** | 1.16 (1.11 ~ 1.22) |
| HDRS | 0.11 | 0.02 | 4.47 | **<.001** | 1.11 (1.06 ~ 1.16) |
| ALSFRS-RL | -0.06 | 0.02 | -2.52 | **0.012** | 0.94 (0.90 ~ 0.99) |
| ALSFRS-RR | -0.27 | 0.09 | -2.96 | **0.003** | 0.77 (0.64 ~ 0.91) |
| Age | 0.03 | 0.01 | 2.55 | **0.011** | 1.03 (1.01 ~ 1.06) |
| Progression Rate | 0.23 | 0.10 | 2.29 | **0.022** | 1.26 (1.03 ~ 1.54) |
| OR: Odds Ratio, CI: Confidence Interval | | | | | |

Note:FSS, Fatigue Severity Scale;VAS,Visual Analog Scale;Amyotrophic Lateral Sclerosis Functional Rating Scale-revised Respiratory Function; HARS, Hamilton Anxiety Rating Scale; HADS, Hamilton Depression Rating Scale; ALSFRS-RL, Amyotrophic Lateral Sclerosis Functional Rating Scale-revised limbs; ALSFRS-RR,Amyotrophic Lateral Sclerosis Functional Rating Scale-revised Respiratory Function; OR, odds ratio. Clinical variables in bold with statistical significance in univariate regression analysis or considered clinically relevant were included in the multivariate analysis.
